# Retrieving High-Resolution Information from Disordered 2D Crystals by Single Particle Cryo-EM

Ricardo D. Righetto<sup>1</sup>, Nikhil Biyani<sup>1</sup>, Julia Kowal<sup>1,2</sup>, Mohamed Chami<sup>1</sup> and Henning Stahlberg<sup>1\*</sup>

<sup>1</sup> Center for Cellular Imaging and NanoAnalytics, Biozentrum, University of Basel, Mattenstrasse 26, CH-4058 Basel, Switzerland.

<sup>2</sup> Institute for Molecular Biology and Biophysics, ETH, Otto-Stern-Weg 5, CH-8093 Zürich, Switzerland

**\* Corresponding author:**

Henning Stahlberg

Center for Cellular Imaging and NanoAnalytics (C-CINA)

Biozentrum, University of Basel

WRO-1058, Mattenstrasse 26

CH-4058 Basel, Switzerland

Phone: +41 61 387 32 62

E-mail: [henning.stahlberg@unibas.ch](mailto:henning.stahlberg@unibas.ch)

**Running title:** Conformational heterogeneity in 2D crystals

**Keywords:** MloK1; MlotiK1; potassium channel; CNBD; cryo-electron microscopy; cytoplasmic domains; transmembrane domains

## Abbreviations

|         |                                  |
|---------|----------------------------------|
| 2D      | two-dimensional                  |
| 3D      | three-dimensional                |
| cAMP    | cyclic adenosine monophosphate   |
| CC      | cross-correlation                |
| CNBD    | cyclic nucleotide binding domain |
| CTF     | contrast transfer function       |
| cryo-EM | cryo-electron microscopy         |
| DED     | direct electron detector         |
| FSC     | Fourier shell correlation        |
| FT      | Fourier transform                |
| GUI     | graphical user interface         |
| SNR     | signal-to-noise ratio            |
| SPA     | single particle analysis         |
| TEM     | transmission electron microscopy |
| TMD     | transmembrane domains            |
| VSD     | voltage sensor domain            |

## Abstract

Electron crystallography can reveal the structure of membrane proteins within 2D crystals under close-to-native conditions. High-resolution structural information can only be reached if crystals are perfectly flat and highly ordered. In practice, such crystals are difficult to obtain. Available image unbending algorithms correct for disorder, but only perform well on images of non-tilted, flat crystals, while out-of-plane distortions are not addressed. Here, we present an approach that employs single-particle refinement procedures to locally unbend crystals in 3D. With this method, density maps of the MloK1 potassium channel with a resolution of 4 Å were obtained from images of 2D crystals that do not diffract beyond 10 Å. Furthermore, 3D classification allowed multiple structures to be resolved, revealing a series of MloK1 conformations within a single 2D crystal. This conformational heterogeneity explains the poor diffraction observed and is related to channel function. The approach is implemented in the FOCUS package.

Electron crystallography of native two-dimensional (2D) crystals of bacteriorhodopsin allowed the determination of the first 3D model of a membrane protein in 1975<sup>1</sup>. Since then, considerable effort has been invested in growing 2D crystals of purified membrane proteins from protein-lipid-detergent mixtures, leading to several high-resolution structures<sup>2,3</sup>. However, in most cases, grown 2D crystals only diffracted to lower resolution<sup>4</sup>. Electron crystallography also requires collecting image data from tilted samples, which is technically difficult and limited in the reachable tilt angle, causing the so-called “missing cone” problem in Fourier space<sup>5</sup>. This limits the resolution along the vertical z-direction, which may make reconstructions appear vertically smeared-out in real space.

Recently, the resolution revolution<sup>6</sup> in cryo-electron microscopy (cryo-EM), triggered by the development of direct electron detectors (DED)<sup>7</sup> and better image processing software, allowed determining the atomic structures of isolated membrane protein particles in detergent or amphipols<sup>8</sup>, or lipid nanodiscs<sup>9</sup>. In particular, DEDs deliver images at much improved signal-to-noise ratios and allow series of dose-fractionated images (movies) to be recorded from the same region, which can be computationally corrected for image drift and merged. Single Particle Analysis (SPA) is now a widespread method capable of determining high-resolution protein structures routinely.

Nevertheless, the capability to analyze the structure of membrane proteins in 2D crystals is important, when (i) such crystals occur naturally in the cell membrane, (ii) the lipid bilayer influences membrane protein function, or (iii) the protein of interest is too small for conventional SPA and the addition of tags to increase the particle size would disturb its function. Two-dimensional crystals can also help elucidating conformational changes triggered by ligands<sup>4,5</sup>. In addition, recent advances towards the rational design of scaffolds may provide a more systematic way to present arbitrary proteins as 2D crystals for structural studies<sup>10,11</sup>. The capability to reach highest-resolution structural data from badly ordered 2D crystals is important.

In electron crystallography, distortions of the 2D crystal lattice in the image plane can be computationally corrected via an interpolation scheme<sup>12</sup>, correlation averaging<sup>13</sup>, or the so-called lattice “unbending” algorithm<sup>14</sup>. However, this unbending is performed in the 2D projection images only. Three-dimensional (3D) out-of-plane distortions in the crystals, *i.e.*, curvature or “bumps” in the membrane plane, could not be corrected. SPA, on the other hand, aligns projections of randomly oriented isolated particles in 3D space to reconstruct the density map of the underlying protein structure<sup>15,16</sup>. Thus, if the unit cells or patches of the 2D crystals are treated as “single particles”, SPA offers the framework required to correct for out-of-plane crystal distortions. This rationale is similar to that of processing segments extracted from helical filaments<sup>17-19</sup>. Previous attempts of “3D unbending” 2D crystal datasets did not reach higher resolutions than the conventional 2D crystallographic approach, despite exploiting natural constraints on the orientation of particles extracted from 2D crystals<sup>20,21</sup>. The lack of DED data at the time prohibited correction for specimen drift, and the algorithms employed were suboptimal compared to the modern, probability-based methodology now used in SPA to account for noisy data while avoiding reference bias<sup>22-25</sup>.

Here, we present a high-resolution application of SPA to electron crystallography data, using cryo-EM movies of the prokaryotic, cyclic-nucleotide modulated potassium channel MloK1<sup>26</sup>. Each of the four MloK1 monomers forming the pore has a transmembrane domain (TMD), a voltage sensor domain (VSD) and a soluble cyclic-nucleotide binding domain (CNBD), which lies in the intracellular side. Although the 2D



crystal images processed did not diffract beyond 10 Å, we obtained a 3D map of MloK1 at 4.0 Å resolution. Furthermore, particle classification allowed detection of different conformations of MloK1 tetramers within the disordered 2D crystals.

## Results

As an extension to recently developed movie-mode electron crystallography algorithms<sup>27</sup>, we implemented a 2D crystal single particle module into the FOCUS software package<sup>28</sup> (**Fig. 1**). Electron dose-fractionated movies of 2D crystals are first corrected for specimen drift and averaged within FOCUS, using external tools<sup>29, 30</sup>. Subsequently, microscope defocus, sample tilt geometry, crystal lattice vectors, and unit cell positions are determined for all movies<sup>27, 31</sup>. This can be done in an automated and parallelized manner in FOCUS<sup>28, 31-33</sup>. Next, the new tab called “Particles” in the graphical user interface (GUI) allows to pick particles, *i.e.*, windowed patches, from the 2D crystal images (**Suppl. Fig. 1**), which are boxed, assembled into a particle stack, and submitted towards implemented SPA workflows, using RELION<sup>23</sup> or FREALIGN<sup>25</sup> within FOCUS. If more than one lattice is present in one image, only the strongest lattice is considered for picking. The center of each windowed patch, here termed “particle”, corresponds to the center of a crystal unit cell located by the classical unbending algorithm<sup>14, 15</sup>, optionally with an additional phase shift applied to translate the center of a protein to the center of the window (**Suppl. Fig. 2**). Only particle positions are considered, for which the cross-correlation (CC) peaks found by the unbending algorithm are stronger than a user-definable threshold. Overlap between boxes containing neighboring particles ensures smooth transitions of the local alignment parameters across the distorted 2D crystal lattice.

Alongside the particles, a meta-data file is generated containing information for every particle, such as the micrograph it came from, its Euler angles converted from the 2D crystal tilt geometry<sup>27</sup>, the picking *x,y* coordinates, and the calculated defocus and astigmatism values at the center of the box following the CTFTILT conventions<sup>34</sup>. Optionally, an additional particle stack can be created simultaneously during picking by correcting each particle box for the local contrast transfer function (CTF) of the electron microscope. Available CTF correction methods are phase-flipping, CTF multiplication, or an *ad hoc* Wiener filter. When generated, the CTF-corrected stack can be used to perform correlation averaging<sup>13</sup> of the 2D crystals, providing immediate feedback on the dataset quality in similar fashion to the 2D class averages generated in SPA (**Suppl. Fig. 3**). Since 2D crystal images present the proteins densely packed in the images, only a comparatively small number (100 to 1000) of 2D crystal images is usually needed to produce large particle numbers (100'000 to 1'000'000). Windowed particles for each 2D crystal image can be averaged, and these fewer image averages can already be used to determine initial 3D models and pre-refine the alignment parameters that will be propagated to the larger particle dataset, thereby speeding up the structure determination process (**Fig. 1**).

### *Processing MloK1 2D crystals*

In order to test our approach, we utilized a 2D crystal dataset of the potassium channel MloK1 in the presence of cAMP that yielded a 4.5 Å resolution map when processed by classical 2D crystallography<sup>26</sup>. The Fourier transforms of the images showed Bragg reflections to 10 Å resolution at best, in most cases worse than 14 Å. Drift-correction of the 346 movies from the previous study was performed with MotionCor2<sup>30</sup> in FOCUS<sup>28</sup>

and the aligned averages were used for further processing. The defocus at the center of the image, tilt geometry and lattice determined previously were retained. Out of the 346 crystal images, 76 were discarded, as they were associated with a second lattice in the same image. The image data from second lattices can be treated independently in classical 2D crystallography, but in SPA processing these would lead to exaggerated resolution estimates due to overlap between particles picked from different lattices in the same image. Using the new GUI, a total of 231,688 unique particles with a box size of 320 x 320 pixels were windowed from the remaining 270 unique images, which had a pixel size of 1.3 Å on the sample level (**Suppl. Fig. 2**). In the non-tilted views, each "particle" was roughly comprised of nine MloK1 tetramers. Because the unit cell of the processed MloK1 2D crystals had P4<sub>2</sub>2 space-group symmetry that contains a screw axis<sup>26</sup>, we applied a phase origin shift of half a unit cell (180°) in the direction of the first lattice vector to the picking coordinates in order to have one tetramer at the center of each particle box. Phase-flipped copies of the particle projections were calculated and stored at the same time as the non-CTF corrected particle projections for the generation of crystal averages (**Suppl. Fig. 3**).

### *Consensus refinement*

Using a modified version of FREALIGN v9.11<sup>25</sup> (**Suppl. Information**) and the initial tilt geometry obtained in FOCUS, we calculated a reconstruction yielding a 3D map at 6.5 Å resolution with C4 symmetry imposed. After pre-refinement using the 270 crystal averages, the global resolution improved to 4.8 Å. Finally, the updated alignment parameters were propagated from the crystal averages to the 231,688 individual raw particles, and refined in a single class using a custom auto-refinement script written for FREALIGN (**Suppl. Information**). The refined map contains nine full MloK1 tetramers (**Fig. 1a**). For further analysis, the central tetramer was cropped out of the full reconstruction and postprocessed (**Fig. 1b**) leading to the "consensus" refinement map at an isotropic average resolution of 4.0 Å based on the Fourier shell correlation (FSC) curve<sup>35-37</sup> (**Fig. 1c and Suppl. Fig. 4d**). To avoid inflation of the FSC curve due to the large overlap between neighboring particle boxes, particles extracted from the same 2D crystal were always assigned to the same half-set throughout the refinement<sup>17</sup>. At this resolution level we could identify densities for many side chains in the transmembrane domains (TMD), especially the larger ones such as phenylalanine and tryptophan and those at the S4-S5 linker (**Suppl. Fig. 5**). Rigid-body fitting of our previously published model for MloK1<sup>26</sup> into the higher-resolution consensus map revealed a sequence register shift of 1 residue at the S4-S5 linker, while the X-ray crystallographic model for the TMD<sup>38</sup> (PDB: 3BEH) was in good agreement with the experimental densities of our map. This new map allowed refining a full-length atomic model of MloK1, improving both its geometry and fit-to-density indicators compared to the previous model (PDB: 6EO1) obtained by classical 2D electron crystallographic processing<sup>26</sup> (**Suppl. Table 1**).

### *3D Classification*

The local resolution estimates and model B-factors for the consensus map (**Suppl. Fig. 4a,b**) suggested high conformational variability of the CNBDs of the molecules, inviting for 3D classification of the particles. Because particle images contained more than one MloK1 tetramer, signal subtraction<sup>39</sup> for the densities corresponding to the neighboring tetramers was applied (**Suppl. Fig. 6**), in order to be able to perform a 3D classification on the central tetramer alone. This was especially important for images of tilted samples, where the projections of neighboring tetramers partially overlap with the projection of the

central tetramer, which is our classification target. We then applied maximum-likelihood 3D classification in FREALIGN<sup>25</sup> to determine conformational variations within the 2D crystals, while imposing C4 symmetry and keeping the alignment parameters for the particles constant. Surprisingly, we found that the dataset was quite heterogeneous. 3D classification produced eight 3D classes at resolutions from 4.4 to 5.6Å that differed conformationally to various degrees (**Fig. 3, Supplementary Fig. 7**). The 3D classification did not correlate with particle positions in the 2D crystals, indicating that no bias from defocus or tilt angle affected the classification (**Suppl. Fig. 8**). When employing a localized reconstruction method<sup>40, 41</sup> to look for non-symmetric conformations, no significant deviations from 4-fold symmetry was detected.

To obtain more insight, the consensus atomic model was flexibly fit into each map of the 3D classes using Normal Mode Analysis<sup>42</sup> and then refined in real space<sup>43</sup>. The resulting models were globally aligned against the consensus map (**Suppl. Fig. 9**), showing root mean square deviations (RMSD) ranging from 0.379 Å (class 7) to 0.720 Å (class 1) towards the consensus map. Alignment of the models against the consensus model by the selectivity filter region only (residues 174-180) produced an ensemble depicting a continuum of conformations of the CNBDs and the S2-S3 loops (**Fig. 4**), within which model #1 is the most different from all other models (**Suppl. Fig. 9b**) and in an “extended” conformation, with the CNBD farthest away from the membrane plane and the TMD. Conversely, model #4 is the most different from model #1 (RMSD of 1.021 Å after global superposition) and is in a “compact” conformation having the CNBD closest to the membrane plane and the TMD (**Fig. 4, Suppl. Fig. 9**). The other five models can be understood as intermediate snapshots along the trajectory between models #1 and #4.

Ranking the models in our ensemble in descending order of their pairwise RMSD values (**Suppl. Table 2 and Suppl. Fig. 9a**) allowed us to inspect the largest conformational changes of MloK1. Along the trajectory from the most compact state (model #4), to the most extended state (model #1) depicted in **Suppl. Movie 1**, the CNBD moves towards the inner pore axis of the channel and simultaneously away from membrane plane. The C-terminal helix of the CNBDs tilts by about 3 degrees further from the membrane, while shifting away from the pore axis. The S2-S3 loop of one monomer closely follows the CNBD  $\beta$ -rolls of the adjacent monomer, which move towards the symmetry axis. At the same time, helix S4 of the VSD extends towards the intracellular membrane boundary. The next largest conformational difference appears between the “extended” model #6 and the “compact” model #1 (RMSD: 0.927 Å, **Suppl. Table 2**). This trajectory is very similar to that between models #4 and #1, but in addition the helices S1-S4 of the VSD tilt by about 1 degree in such a way that the S1-S2 loop comes closer to the periplasmic pore turrets (**Suppl. Movie 2**). Among the largest conformational changes observed is a 6-degree helical rotation of the CNBD around the symmetry axis, perpendicular to the membrane plane, between intermediate models #3 and #5 (RMSD: 0.845 Å, **Suppl. Table 2**), as shown in **Suppl. Movie 3**. Compared to model #1, the C-terminal helix in “extended”-like model #3 is rotated by about 4 degrees clockwise when seen from the CNBD side, while in the “compact” model #5 it is rotated by about 3 degrees counter-clockwise. A rotation of the selectivity filter by about the same magnitude also occurs in this trajectory. Finally, the most extended conformers of our ensemble (models #1 and #3) also have the S6 helix crossing bundle and the selectivity filter slightly more constricted (< 1 Å) than the most compact ensemble members (models #4, #5 and #6).

## Discussion

Electron crystallography applied to well-ordered 2D crystals has in the past delivered structures of membrane proteins at far better resolutions than achievable by SPA. However, the resolution revolution in cryo-EM reversed this, so that today the precision of the physical arrangement of proteins in the 2D crystals is lower than the resolution achievable by SPA. Nevertheless, cases exist where the structure of a membrane protein in the lipid environment provided by a 2D crystal is important.

Here, we present a hybrid approach for the analysis of 2D crystal images, combining 2D crystallographic and single particle image processing methods. Even though the missing cone effect is still present, the application of SPA algorithms to the MloK1 dataset ameliorated the overall resolution by accounting for local variations in the tilt geometries along the distorted 2D crystals, thus offering a higher diversity of views for the 3D reconstruction. This documents that the lack of crystal planarity can become an advantage in SPA. Also, masking the reference map along the iterative refinement in SPA is akin to projective constrained optimization<sup>27, 44</sup>, which both are methods to reduce the impact of the missing cone.

Our highest resolution structure, derived from the consensus map (**Fig. 2**), is in general agreement with our previously published model<sup>26</sup>. However, we here show that the previously determined structure was an average of several coexisting conformations. Consequently, SPA processing enabled the particles within the 2D crystals to be classified, revealing significant conformational variations. While 2D classification of unit cells has been explored in the past<sup>16, 45</sup>, to our knowledge we here present for the first time the retrieval of distinct 3D classes from within the same 2D crystal dataset. The eight obtained 3D classes have a slightly lower resolution than the consensus map, likely due to the limited number of particles in each class. The conformational differences observed between the individual 3D classes explain the low resolution to which the imaged 2D crystals showed diffraction. The analysis suggests that the CNBDs were only partially occupied with ligands in the cAMP-saturated crystals. Following Rangl *et al.*<sup>46</sup>, we interpret the extended “up-state” orientation of the CNBDs as the cAMP-free orientation, while the compact “down-state” orientation with the CNBDs approaching the membrane, is the cAMP-bound conformation<sup>26</sup>. Although such insights have been obtained previously from lower resolution structures<sup>47</sup> and high-speed AFM experiments<sup>46</sup>, only now, with the processing workflow proposed here, could they be directly observed in the 3D structure of MloK1 within the same dataset.

Variations in CNBD positions are correlated with changes in the transmembrane regions including the VSD of MloK1, yielding insights into the mechanistic links between CNBDs and channel modulation. The observed interaction between the S2-S3 loop of the VSD and the CNBD  $\beta$ -rolls of the adjacent monomer corroborates the coupling between VSD and CNBD previously hypothesized<sup>26</sup>. In this proposed mechanism, the channel is open and in a compact conformation when cAMP is bound, and, upon ligand unbinding, the CNBD extends away from the membrane and closes the channel, accompanied by a tilting of the VSD towards the extracellular side (**Suppl. Movie 2**). This suggests that a change in the binding state of the CNBD is transduced to the selectivity filter via the VSD, possibly also with help of the N-terminal loop and the S4-S5 linker (**Suppl. Movie 1 and Suppl. Movie 2**), rather than directly via the C-linker of S6. Furthermore, we also observe a helical rotation of the CNBD around the pore axis during the CNBD extension, which is orchestrated with a rotation of the selectivity filter in the opposite direction (**Suppl. Movie 3**). Combined with a constriction of the pore, we suggest this mechanism to then prevent

the passage of K<sup>+</sup> ions at the selectivity filter<sup>26, 48, 49</sup>. While the S6 helix crossing bundle also constricts slightly during this conformational change, it remains too wide to block ion conduction.

In summary, we have shown that the SPA approach greatly reduces the need for perfectly planar, well ordered 2D crystals. The procedure allows retrieving high-resolution information from disordered and non-flat 2D crystals, as illustrated by the 4 Å consensus model presented. Importantly, SPA also allows detecting conformational variations of proteins in the 2D crystals. Classification of the low-resolution 2D crystal images of the potassium channel MloK1 by SPA resulted in a series of 3D maps with resolutions between 4.4 and 5.6 Å, giving insight into ligand binding and channel gating. The data processing workflow is available from a GUI in the FOCUS package.

## Accession codes

The raw data are deposited in the EMPIAR database, accession code XXXX. The final maps are deposited in the EMDB, accession codes XXXX. The fitted models for the consensus refinement and the ensemble of conformations are deposited in the PDB, accession codes XXXX.

## Acknowledgments

We thank N. Grigorieff for software support, D. Herbst and T. Maier for computational resources and discussions, C. Nimigean and R. Adaixo for discussions, and S. Müller for support in manuscript preparation. Calculations were performed at sciCORE of the University of Basel. RDR acknowledges funding from the Fellowships for Excellence program sponsored by the Werner-Siemens Foundation and the University of Basel. This work was supported by the Swiss National Science Foundation through grant 205320\_166164 and the NCCR TransCure.



## References

1. Unwin, P.N.T. & Henderson, R. Molecular Structure Determination by Electron Microscopy of Unstained Crystalline Specimens. *J. Mol. Biol.* 94, 425-440 (1975).
2. Henderson, R. et al. Model for the structure of *Bacteriorhodopsin* based on high-resolution electron cryo-microscopy. *J. Mol. Biol.* 213, 899- 929 (1990).
3. Gonen, T. et al. Lipid-protein interactions in double-layered two-dimensional AQP0 crystals. *Nature* 438, 633-638 (2005).
4. Abeyrathne, P.D. et al. in *Comprehensive Biophysics*, Vol. 1.19. (ed. E.H. Egelman) 277-310 (Academic Press, Oxford, UK; 2012).
5. Stahlberg, H., Biyani, N. & Engel, A. 3D reconstruction of two-dimensional crystals. *Arch Biochem Biophys* 581, 68-77 (2015).
6. Kühlbrandt, W. Biochemistry. The resolution revolution. *Science* 343, 1443-1444 (2014).
7. McMullan, G., Faruqi, A.R. & Henderson, R. Direct Electron Detectors. *Methods in enzymology* 579, 1-17 (2016).
8. Liao, M., Cao, E., Julius, D. & Cheng, Y. Structure of the TRPV1 ion channel determined by electron cryo-microscopy. *Nature* 504, 107-112 (2013).
9. Gao, Y., Cao, E., Julius, D. & Cheng, Y. TRPV1 structures in nanodiscs reveal mechanisms of ligand and lipid action. *Nature* 534, 347-351 (2016).
10. Gonen, S., DiMaio, F., Gonen, T. & Baker, D. Design of ordered two-dimensional arrays mediated by noncovalent protein-protein interfaces. *Science* 348, 1365-1368 (2015).
11. Suzuki, Y. et al. Self-assembly of coherently dynamic, auxetic, two-dimensional protein crystals. *Nature* 533, 369-373 (2016).
12. van Heel, M. & Hollenberg, J. in *Electron Microscopy at Molecular Dimensions*. (eds. W. Baumeister & W. Vogell) (Springer, Berlin, Heidelberg; 1980).
13. Saxton, W.O. & Baumeister, W. The correlation averaging of a regularly arranged bacterial cell envelope protein. *J. Microsc.* 127, 127-138 (1982).
14. Henderson, R., Baldwin, J.M., Downing, K.H., Lepault, J. & Zemlin, F. Structure of purple membrane from *Halobacterium halobium* : recording, measurement and evaluation of electron micrographs at 3.5 Å resolution. *Ultramicroscopy* 19, 147-178 (1986).
15. Crowther, R.A., De Rosier, D.J. & Klug, A. The reconstruction of a three-dimensional structure from projections and its application to electron microscopy. *Proc. Roy. Soc. Lond. A.* 317, 319-340 (1970).

16. Frank, J., Chiu, W. & Degn, L. The characterization of structural variations within a crystal field. *Ultramicroscopy* 26, 345-360 (1988).
17. He, S. & Scheres, S.H.W. Helical reconstruction in RELION. *J Struct Biol* 198, 163-176 (2017).
18. Egelman, E.H. The iterative helical real space reconstruction method: surmounting the problems posed by real polymers. *J Struct Biol* 157, 83-94 (2007).
19. Sachse, C. et al. High-resolution electron microscopy of helical specimens: a fresh look at tobacco mosaic virus. *J Mol Biol* 371, 812-835 (2007).
20. Scherer, S., Arbeit, M., Kowal, J., Zeng, X. & Stahlberg, H. Single particle 3D reconstruction for 2D crystal images of membrane proteins. *J Struct Biol* 185, 267-277 (2014).
21. Kuang, Q. et al. A Refined Single-Particle Reconstruction Procedure to Process Two-Dimensional Crystal Images from Transmission Electron Microscopy. *Microsc Microanal* 21, 876-885 (2015).
22. Stewart, A. & Grigorieff, N. Noise bias in the refinement of structures derived from single particles. *Ultramicroscopy* 102, 67-84 (2004).
23. Scheres, S.H. RELION: implementation of a Bayesian approach to cryo-EM structure determination. *J Struct Biol* 180, 519-530 (2012).
24. Scheres, S.H. A Bayesian view on cryo-EM structure determination. *J Mol Biol* 415, 406-418 (2012).
25. Lyumkis, D., Brilot, A.F., Theobald, D.L. & Grigorieff, N. Likelihood-based classification of cryo-EM images using FREALIGN. *J Struct Biol* 183, 377-388 (2013).
26. Kowal, J. et al. High-Resolution Cryoelectron Microscopy Structure of the Cyclic Nucleotide-Modulated Potassium Channel MloK1 in a Lipid Bilayer. *Structure* 26, 20-27 e23 (2018).
27. Biyani, N. et al. Image processing techniques for high-resolution structure determination from badly ordered 2D crystals. *J Struct Biol* 203, 120-134 (2018).
28. Biyani, N. et al. Focus: The interface between data collection and data processing in cryo-EM. *J Struct Biol* 198, 124-133 (2017).
29. Grant, T. & Grigorieff, N. Measuring the optimal exposure for single particle cryo-EM using a 2.6 Å reconstruction of rotavirus VP6. *eLife* 4, e06980 (2015).
30. Zheng, S.Q. et al. MotionCor2: anisotropic correction of beam-induced motion for improved cryo-electron microscopy. *Nat Methods* 14, 331-332 (2017).

31. Gipson, B., Zeng, X., Zhang, Z.Y. & Stahlberg, H. 2dx--user-friendly image processing for 2D crystals. *J Struct Biol* 157, 64-72 (2007).
32. Scherer, S. et al. 2dx\_automator: implementation of a semiautomatic high-throughput high-resolution cryo-electron crystallography pipeline. *J Struct Biol* 186, 302-307 (2014).
33. Gipson, B., Zeng, X. & Stahlberg, H. 2dx\_merge: Data management and merging for 2D crystal images. *J Struct Biol* 160, 375-384 (2007).
34. Mindell, J.A. & Grigorieff, N. Accurate determination of local defocus and specimen tilt in electron microscopy. *J Struct Biol* 142, 334-347 (2003).
35. Harauz, G. & van Heel, M. Exact filters for general geometry three dimensional reconstruction. *Optik (Stuttgart)* 73, 146-156 (1986).
36. Rosenthal, P.B. & Henderson, R. Optimal determination of particle orientation, absolute hand, and contrast loss in single-particle electron cryomicroscopy. *J Mol Biol* 333, 721-745 (2003).
37. van Heel, M. & Schatz, M. Fourier shell correlation threshold criteria. *Journal of structural biology* 151, 250-262 (2005).
38. Clayton, G.M., Altieri, S., Heginbotham, L., Unger, V.M. & Morais-Cabral, J.H. Structure of the transmembrane regions of a bacterial cyclic nucleotide-regulated channel. *Proc Natl Acad Sci U S A* 105, 1511-1515 (2008).
39. Bai, X.C., Rajendra, E., Yang, G., Shi, Y. & Scheres, S.H. Sampling the conformational space of the catalytic subunit of human gamma-secretase. *eLife* 4 (2015).
40. Ilca, S.L. et al. Localized reconstruction of subunits from electron cryomicroscopy images of macromolecular complexes. *Nature communications* 6, 8843 (2015).
41. Grigorieff, N. Frealign: An Exploratory Tool for Single-Particle Cryo-EM. *Methods in enzymology* 579, 191-226 (2016).
42. Lopez-Blanco, J.R. & Chacon, P. iMODFIT: efficient and robust flexible fitting based on vibrational analysis in internal coordinates. *J Struct Biol* 184, 261-270 (2013).
43. Afonine, P.V. et al. Real-space refinement in PHENIX for cryo-EM and crystallography. *Acta Crystallogr D Struct Biol* 74, 531-544 (2018).
44. Gipson, B.R. et al. Automatic recovery of missing amplitudes and phases in tilt-limited electron crystallography of two-dimensional crystals. *Phys Rev E Stat Nonlin Soft Matter Phys* 84, 011916 (2011).
45. Sherman, M.B., Soejima, T., Chiu, W. & van Heel, M. Multivariate analysis of single unit cells in electron crystallography. *Ultramicroscopy* 74, 179-199 (1998).



46. Rangl, M. et al. Real-time visualization of conformational changes within single MloK1 cyclic nucleotide-modulated channels. *Nature Comm* 7, 12789 (2016).
47. Kowal, J. et al. Ligand-induced structural changes in the cyclic nucleotide-modulated potassium channel MloK1. *Nature Comm* 5, 3106 (2014).
48. Tombola, F., Pathak, M.M. & Isacoff, E.Y. How does voltage open an ion channel? *Annu Rev Cell Dev Biol* 22, 23-52 (2006).
49. Liu, S. et al. Ion-binding properties of a K<sup>+</sup> channel selectivity filter in different conformations. *Proc Natl Acad Sci U S A* 112, 15096-15100 (2015).

## Methods

### *Sample preparation*

The expression and purification of MloK1, and the growth of 2D crystals in the presence of cAMP is described in Kowal *et al.* (2014)<sup>1</sup>.

### *Cryo-EM imaging*

The dataset of 346 movies recorded and processed for Kowal *et al.* (2018)<sup>2</sup> was employed. As reported, the data were collected on an FEI Titan Krios TEM equipped with a Gatan K2 DED. Total dose: 40 e<sup>-</sup>/Å<sup>2</sup> distributed over 40 movie frames. Pixel size: 1.3 Å on the sample level (counting mode). Nominal tilt range: -55° to +55°.

### *Data processing*

Movies were drift-corrected using MotionCor2<sup>3</sup> via FOCUS<sup>4</sup>. Micrographs were processed using the FOCUS package until the 3D merging step, following standard 2D electron crystallography procedures as previously implemented in the *2dx* package<sup>5</sup>. This yielded the defocus, tilt geometry, lattice and phase origin information for each micrograph. Using our newly implemented GUI, particles, *i.e.*, patches of the 2D crystal image centered on crystal unit cells, were extracted from positions indicated by the cross-correlation profile of the classical unbending algorithm<sup>6</sup>. Only one lattice per image was considered, resulting in the exclusion of 76 duplicated images due to the presence of a second lattice. Unit cells with a cross-correlation (CC) peak above each micrograph's average CC peak value were picked, an approach closely coinciding with the auto-masking procedure for 2D crystals. As the unit cell of the MloK1 2D crystals had P42<sub>1</sub>2 symmetry<sup>1, 2, 7</sup>, a shift of 180 degrees along the first lattice vector was applied to the phase origin (the crystallographic unit cell) to position a MloK1 tetramer at the center of the particle box and allow the imposition of C4 symmetry in the single-particle refinement steps. The box size was of 320 square pixels roughly comprising nine MloK1 tetramers in the non-tilted views. Individual particle images were CTF-corrected by phase flipping and averaged on a per-crystal basis using new scripts in FOCUS. The particle export script also ensures that particles picked from the same 2D crystal stay in the same half-set in order to prevent inflated resolution estimations based on the FSC because of the overlap between neighboring particle boxes<sup>8</sup>.

### *Consensus refinement*

Pre-refinement using the crystal averages was performed using a custom auto-refinement script based on FREALIGN version 9.11<sup>9</sup> (see **Supplementary Information** for details). Subsequent refinement after convergence was performed using the same auto-refinement procedure, but now using all particles and inheriting the alignments determined in the pre-refinement and defocus values as estimated at the center of the particle window according to the initial tilt geometry, with CTF correction performed internally by FREALIGN using Wiener filtering<sup>10, 11</sup>. Both, in the pre-refinement and the refinement steps, a spherical mask was initially applied to the reference 3D reconstruction leaving a region comprised of about nine MloK1 tetramers for processing. To prevent reference bias, the highest resolution limit used for particle alignment was 7.52 Å.

### *3D classification*

A focused spherical mask on the central MloK1 tetramer was applied to subtract the signal from the neighboring tetramers using RELION<sup>12, 13</sup>. Afterwards, the signal-

subtracted particle stack was subjected to 90 cycles of maximum-likelihood 3D classification in FREALIGN<sup>14</sup> using eight classes and a resolution limit of 7.0 Å. No alignments were performed at this stage. To decrease the processing time, for this classification the particle stack was downsampled to a pixel size of 2.6 Å by Fourier cropping. Asymmetric classification using both C1 symmetry and the localized reconstruction<sup>9, 15</sup> of a single suitably masked monomer to search for deviations from C4 symmetry were also attempted.

### *Map postprocessing*

For post-processing and analysis of every map, a box of 104 cubic voxels containing only the central MloK1 tetramer was extracted from the larger half-maps. The box center was translated by 12 voxels in the Z direction to coincide with the center of the MloK1 tetramer before cropping out the smaller volume. FSC curves between half-maps were calculated using a spherical mask of 42 voxels radius and a soft cosine-edge of 6 voxels width, and corrected for the relative volumes of the particle and the mask within the box<sup>8</sup>. The maps were sharpened by deconvolving the MTF curve of the Gatan K2 detector at 300 kV and then using the *phenix.auto\_sharpen* program<sup>16</sup>, and low pass-filtered at the respective resolution cutoffs defined by the 0.143 threshold criterion<sup>17</sup> using a soft cosine-edge filter. Resolution was also assessed using the 1/2-bit criterion<sup>18</sup> with an estimated particle diameter of 100 Å and 4-fold symmetry. A Python script called *focus.postprocess* was written based on the MRCZ module<sup>19</sup> and included as a command-line tool in FOCUS. Local resolution maps were calculated using Blocres<sup>20</sup>.

### *Model building*

#### Consensus model

A new model was assembled by taking the N-terminal from PDB 6EO1<sup>2</sup> (residues 1-6), the TMD from PDB 3BEH<sup>21</sup> (residues 7-219), the CNBD from PDB 3CL1<sup>22</sup> (residues 220-349) and the C-terminus also from PDB 6EO1<sup>2</sup> (residues 350-355). These domains were individually rigid-body fitted into our consensus map using UCSF Chimera<sup>22</sup> and then saved together as a single chain in a new PDB file. Atoms of incomplete residues were filled in using Coot<sup>23</sup>. The model was then flexibly fit into the consensus map using normal mode analysis with iMODFIT<sup>24</sup> at a resolution limit of 4.0 Å. Riding hydrogens were added to prevent steric clashes in the subsequent refinement<sup>25</sup>. Secondary structure annotation was calculated using *ksdssp*<sup>26</sup> and manually adjusted in UCSF Chimera. This single chain was then refined into the map using *phenix.real\_space\_refine*<sup>27</sup> with electron scattering form factors, global minimization and B-factor refinement. Modelling issues such as Ramachandran outliers, rotamer outliers and steric clashes were monitored using Molprobability<sup>28</sup> and manually corrected in Coot, always followed by real-space refinement rounds in PHENIX<sup>29</sup>. Upon convergence, three more copies of the chain were generated and rigid-body fitted into the map in UCSF Chimera to account for the tetrameric channel. This was followed again by iterations of real-space refinement in PHENIX and manual tweaking in Coot whenever necessary, which were always followed by refinement rounds in PHENIX. Finally, potassium ions and associated restraints were added to the model at putative positions to optimize the geometry of the selectivity filter and real-space refined again in PHENIX. Model quality metrics were assessed throughout refinement using Molprobability, EMRinger<sup>30</sup>, and per-residue plots in Coot.

## Model ensemble

Based on the consensus model and the eight maps obtained after convergence of 3D classification in FREALIGN, we generated an ensemble of models representing the conformational variability of MloK1. The consensus model was flexibly fit into each map using Normal Mode Analysis by iMODFIT<sup>24</sup> followed by 5 cycles of real-space refinement in PHENIX with electron scattering form factors, global minimization and B-factor refinement, always using the global resolution determined for each 3D class, which ranged from 4.4 Å (class 3) to 5.6 Å (class 8). For comparison, every model in the ensemble was superposed against each other and against the consensus model using *phenix.superpose\_pdbs*, and the RMSD between the C- $\alpha$  atoms was computed as a similarity measure. Based on the pairwise RMSD matrix resulting from the eight models, hierarchical agglomerative clustering<sup>31</sup> was performed using the single linkage criterion with the *scikit-learn* Python module<sup>32</sup>. For visual analysis, all members of the ensemble were superposed onto the consensus model based on the selectivity filter only (residues 174:180). Distances and angles were calculated using the Axes/Planes/Centroids tool<sup>33</sup> in UCSF Chimera.

## Data analysis

Results were analyzed with the aid of Python scripts based on the MRCZ<sup>19</sup>, NumPy (<http://www.numpy.org>), scikit-learn<sup>32</sup> and SciPy (<http://www.scipy.org>) modules.

## Figures and Animations

Plots were generated using the *matplotlib* Python module (<http://www.matplotlib.org>). Figures and movies were made with the aid of UCSF Chimera<sup>23</sup>.

## References

1. Kowal, J. et al. Ligand-induced structural changes in the cyclic nucleotide-modulated potassium channel MloK1. *Nature Comm* **5**, 3106 (2014).
2. Kowal, J. et al. High-Resolution Cryoelectron Microscopy Structure of the Cyclic Nucleotide-Modulated Potassium Channel MloK1 in a Lipid Bilayer. *Structure* **26**, 20-27 e23 (2018).
3. Zheng, S.Q. et al. MotionCor2: anisotropic correction of beam-induced motion for improved cryo-electron microscopy. *Nat Methods* **14**, 331-332 (2017).
4. Biyani, N. et al. Focus: The interface between data collection and data processing in cryo-EM. *J Struct Biol* **198**, 124-133 (2017).
5. Gipson, B., Zeng, X., Zhang, Z.Y. & Stahlberg, H. 2dx--user-friendly image processing for 2D crystals. *J Struct Biol* **157**, 64-72 (2007).
6. Henderson, R., Baldwin, J.M., Downing, K.H., Lepault, J. & Zemlin, F. Structure of purple membrane from *Halobacterium halobium* : recording, measurement and evaluation of electron micrographs at 3.5 Å resolution. *Ultramicroscopy* **19**, 147-178 (1986).
7. Chiu, P.-L. et al. The Structure of the Prokaryotic Cyclic Nucleotide-Modulated Potassium Channel MloK1 at 16 Å Resolution. *Structure* **15**, 1053-1064 (2007).
8. He, S. & Scheres, S.H.W. Helical reconstruction in RELION. *J Struct Biol* **198**, 163-176 (2017).
9. Grigorieff, N. FREALIGN: An Exploratory Tool for Single-Particle Cryo-EM. *Methods in Enzymology* **579**, 191-226 (2016).
10. Stewart, A. & Grigorieff, N. Noise bias in the refinement of structures derived from single particles. *Ultramicroscopy* **102**, 67-84 (2004).
11. Sindelar, C.V. & Grigorieff, N. Optimal noise reduction in 3D reconstructions of single particles using a volume-normalized filter. *J Struct Biol* **180**, 26-38 (2012).
12. Bai, X.C., Rajendra, E., Yang, G., Shi, Y. & Scheres, S.H. Sampling the conformational space of the catalytic subunit of human gamma-secretase. *eLife* **4** (2015).
13. Scheres, S.H. RELION: implementation of a Bayesian approach to cryo-EM structure determination. *J Struct Biol* **180**, 519-530 (2012).
14. Lyumkis, D., Brilot, A.F., Theobald, D.L. & Grigorieff, N. Likelihood-based classification of cryo-EM images using FREALIGN. *J Struct Biol* **183**, 377-388 (2013).
15. Ilca, S.L. et al. Localized reconstruction of subunits from electron cryomicroscopy images of macromolecular complexes. *Nature Comm* **6**, 8843 (2015).
16. Terwilliger, T.C., Sobolev, O.V., Afonine, P.V. & Adams, P.D. Automated map sharpening by maximization of detail and connectivity. *Acta Crystallogr D Struct Biol* **74**, 545-559 (2018).
17. Rosenthal, P.B. & Henderson, R. Optimal determination of particle orientation, absolute hand, and contrast loss in single-particle electron cryomicroscopy. *J Mol Biol* **333**, 721-745 (2003).
18. van Heel, M. & Schatz, M. Fourier shell correlation threshold criteria. *J Struct Biol* **151**, 250-262 (2005).
19. McLeod, R.A., Diogo Righetto, R., Stewart, A. & Stahlberg, H. MRCZ - A file format for cryo-TEM data with fast compression. *J Struct Biol* **201**, 252-257 (2018).
20. Cardone, G., Heymann, J.B. & Steven, A.C. One number does not fit all: mapping local variations in resolution in cryo-EM reconstructions. *J Struct Biol* **184**, 226-236 (2013).

21. Clayton, G.M., Altieri, S., Heginbotham, L., Unger, V.M. & Morais-Cabral, J.H. Structure of the transmembrane regions of a bacterial cyclic nucleotide-regulated channel. *Proc Natl Acad Sci U S A* **105**, 1511-1515 (2008).
22. Altieri, S.L. et al. Structural and energetic analysis of activation by a cyclic nucleotide binding domain. *J Mol Biol* **381**, 655-669 (2008).
23. Pettersen, E.F. et al. UCSF Chimera--a visualization system for exploratory research and analysis. *J Comput Chem* **25**, 1605-1612 (2004).
24. Lopez-Blanco, J.R. & Chacon, P. iMODFIT: efficient and robust flexible fitting based on vibrational analysis in internal coordinates. *J Struct Biol* **184**, 261-270 (2013).
25. Word, J.M., Lovell, S.C., Richardson, J.S. & Richardson, D.C. Asparagine and glutamine: using hydrogen atom contacts in the choice of side-chain amide orientation. *J Mol Biol* **285**, 1735-1747 (1999).
26. Kabsch, W. & Sander, C. Dictionary of protein secondary structure: pattern recognition of hydrogen-bonded and geometrical features. *Biopolymers* **22**, 2577-2637 (1983).
27. Afonine, P.V. et al. Real-space refinement in PHENIX for cryo-EM and crystallography. *Acta Crystallogr D Struct Biol* **74**, 531-544 (2018).
28. Davis, I.W. et al. MolProbity: all-atom contacts and structure validation for proteins and nucleic acids. *Nucleic Acids Res.* **35**, W375-383 (2007).
29. Adams, P.D. et al. PHENIX: building new software for automated crystallographic structure determination. *Acta Crystallogr. D Biol. Crystallogr.* **58**, 1948-1954 (2002).
30. Barad, B.A. et al. EMRinger: side chain-directed model and map validation for 3D cryo-electron microscopy. *Nat. Methods* **12**, 943-946 (2015).
31. Kelley, L.A., Gardner, S.P. & Sutcliffe, M.J. An automated approach for clustering an ensemble of NMR-derived protein structures into conformationally related subfamilies. *Protein Eng.* **9**, 1063-1065 (1996).
32. Pedregosa, F. et al. Scikit-learn: Machine learning in Python. *J Mach Learn Res* **21**, 2825-2830 (2011).
33. Meng, E.C., Pettersen, E.F., Couch, G.S., Huang, C.C. & Ferrin, T.E. Tools for integrated sequence-structure analysis with UCSF Chimera. *BMC Bioinformatics* **7**, 339 (2006).



## Figure Legends

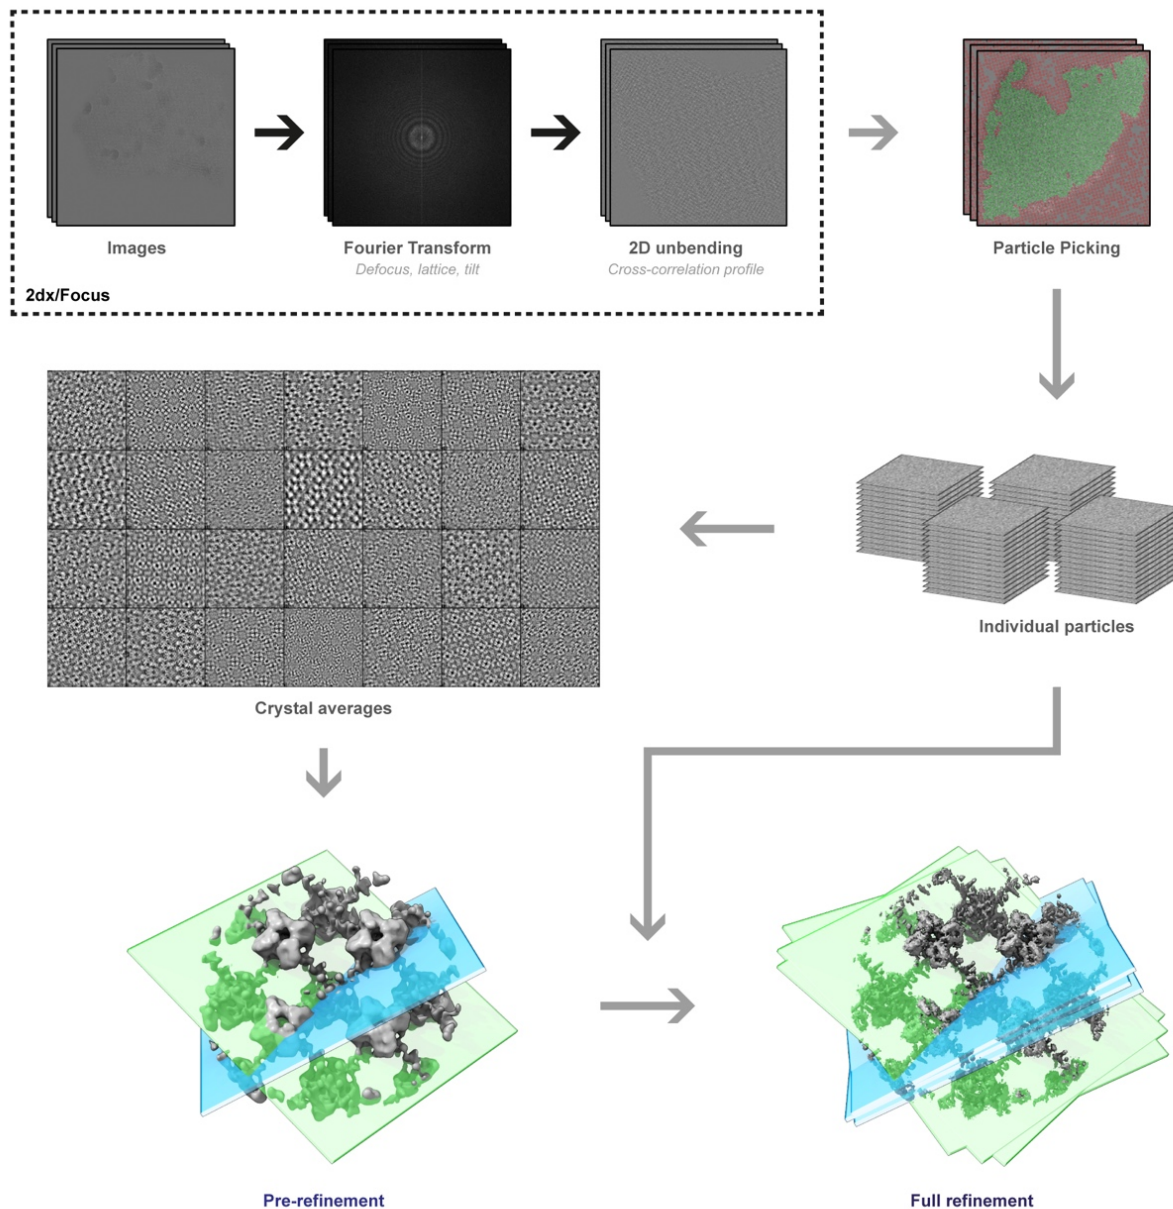

**Figure 1. Workflow employed to process 2D crystal data by single-particle analysis programs.** Steps depicted within the dashed box were previously available in the 2D crystallography mode of FOCUS. A new GUI (**Supplementary Figure 1**) was implemented to pick particles from the 2D crystals based on the unit cell positions obtained from classical unbending. Stacks of individual particles are then exported together with the associated metadata for processing with established SPA software. The particles extracted from the 2D crystal in each image are averaged in FOCUS for quality assessment, and rapid pre-refinement of the map is done with FREALIGN using these crystal averages as input. For simplicity, slices representing two crystal averages in different orientations are shown (light blue and light green). Then, the individual particles are initialized with the pre-refined alignment parameters and provided to FREALIGN to perform a full refinement to high resolution. These individual particles might end up having slightly different orientations than the crystal average, due to distortions in the 2D crystal lattice.

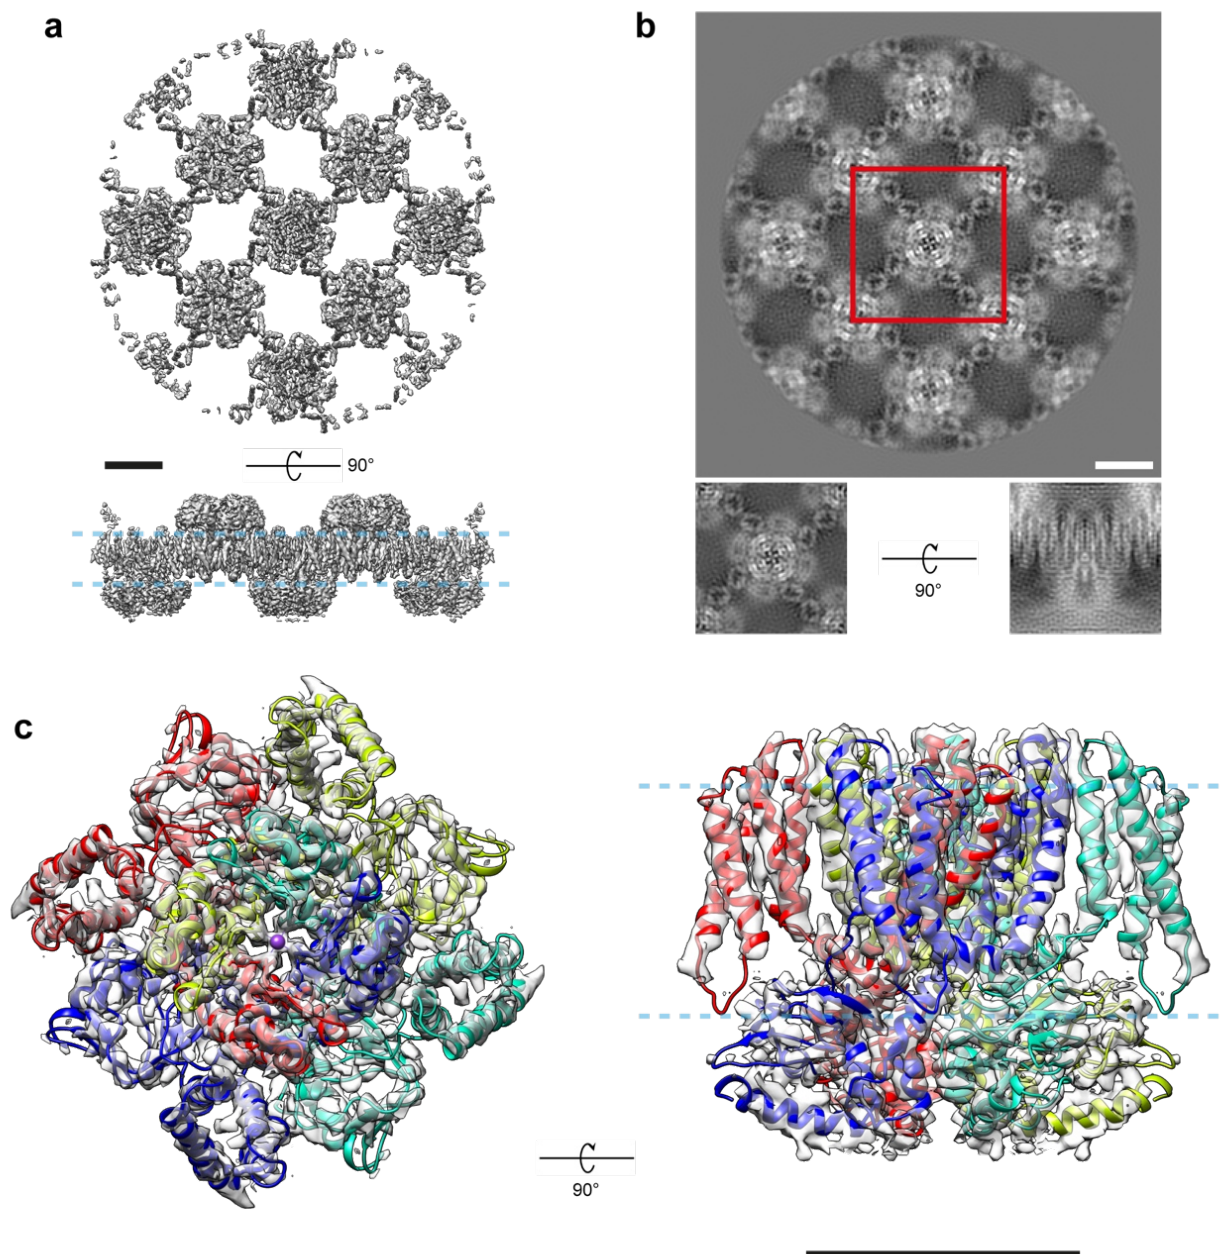

**Figure 2. The 4.0 Å electron density map of full-length MloK1.** The map was obtained from the consensus single-particle refinement of 2D crystal data in FREALIGN. a) The full refined map containing approximately nine MloK1 tetramers; total molecular weight over 1 MDa. b) Projection of the full map along the Z axis. The sub-volume used for postprocessing is indicated (red box). Insets: projections of the central sub-volume orthogonal to the xy and xz planes. c) The postprocessed map of the central tetramer with the refined atomic model fit into the density, viewed from the extracellular side and parallel to the membrane plane. The pale blue dashed lines indicate the approximate position of the lipid bilayer. Scale bars: 50 Å.



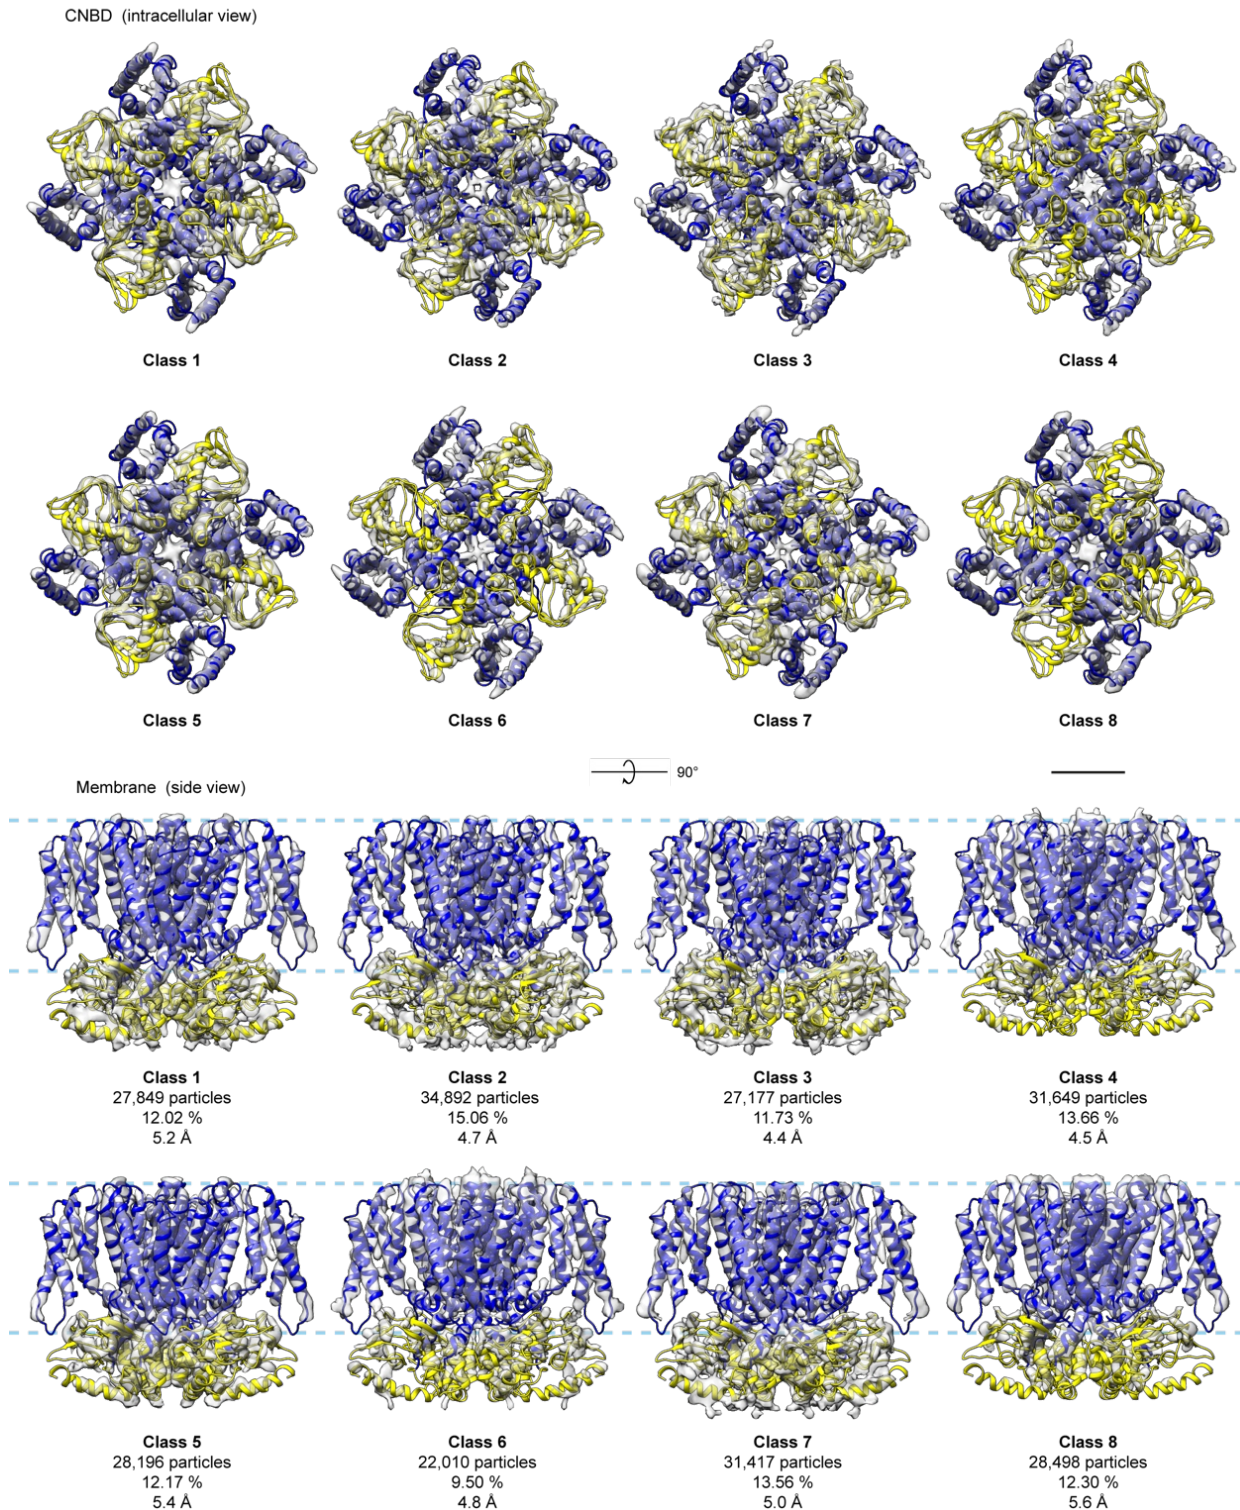

**Figure 3. Conformational continuum of MloK1 from 2D crystals.** All the maps were obtained from one 2D crystal dataset using signal subtraction and 3D classification after consensus refinement. The consensus model was flexibly fitted and refined into each 3D class. The CNBD is colored yellow and the TMD is colored blue, while the maps are shown as transparent grey surfaces. The map threshold for each class was calculated such that all iso-surfaces enclose the same volume. The pale blue dashed line indicates the approximate position of the lipid bilayer. Conformational variations among the classes primarily change the height of the CNBDs in relation to the membrane slab and their tilt in relation to the TMD and the VSD. C4 symmetry was applied. Scale bar: 25 Å.

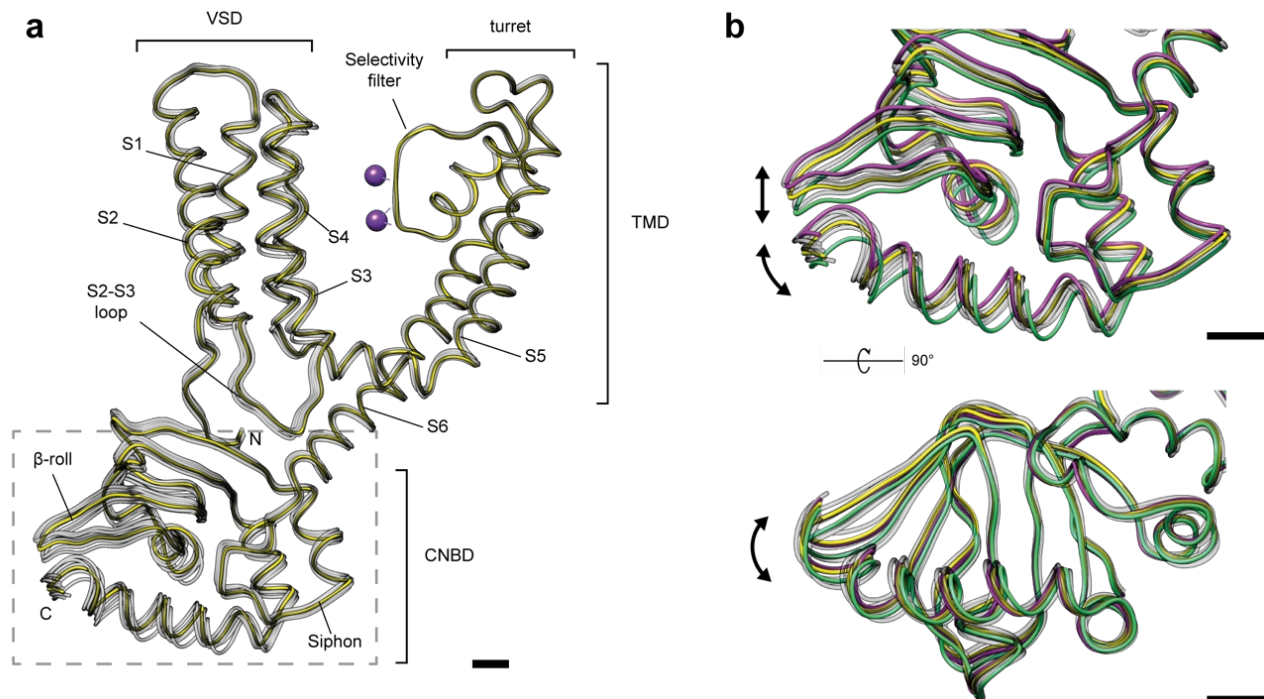

**Figure 4. Conformational ensemble of MloK1 within the 2D crystals.** The consensus model (yellow) and the eight atomic models derived from the 3D classes (gray) are shown superposed. For this visualization, the eight models in the ensemble were aligned to the selectivity filter of the consensus model (residues 174-180). a) One full chain of the MloK1 tetramer is shown with the different domains indicated; the dashed light-gray box indicates the area highlighted for panels b) and c); b) close-up view of the CNBD part where most conformational changes occur. Models #1 and #4 are the most different from each other (RMSD 1.021 Å) and are depicted in green and magenta, respectively. The arrows indicate the principal directions of conformational variability. Scale bars: 5 Å.
